# Supplementary material for: Enhanced photocatalytic CO2 reduction using a trimetallic organic framework as the catalyst under visible light
Source: Royal Society of Chemistry journal article supplement (doi:10.1039/d3nj05781j), 2024-01-01
Supplement: d3nj05781j1.pdf [file d3nj05781j1.pdf]

Supporting Information for Enhanced the Photocatalytic CO<sub>2</sub> Reduction using  
Trimetallic Organic Framework as the catalyst Under Visible Light.

Chunxia Li, Huimin Yu, Shaohong Guo\*, Jingchun Jia, Ying Chang, Meilin Jia, Jiang  
Wang

*College of Chemistry and Environmental Science, Inner Mongolia Key Laboratory of Green  
Catalysis and Inner Mongolia Collaborative Innovation Center for Water Environment Safety,  
Inner Mongolia Normal University, Hohhot, 010022, China.*

\*Corresponding author. E-mail:20200043@imnu.edu.cn

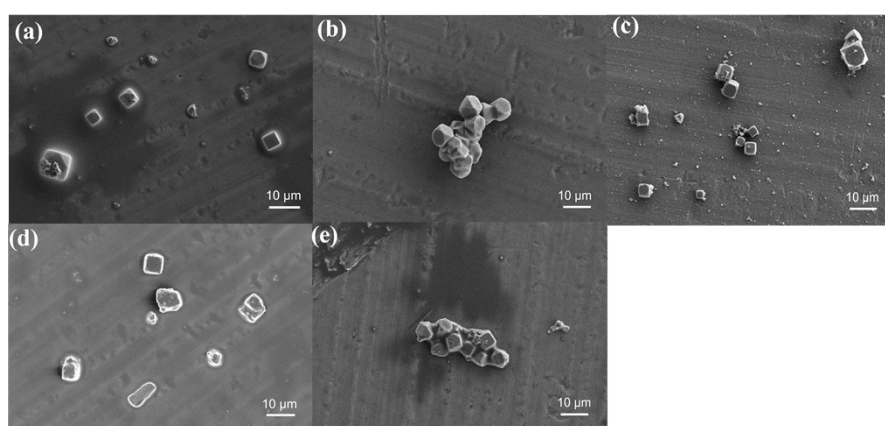

**Figure S1.** SEM images (scale: 10μm) (a-e) of the Fe<sub>0.02</sub>Ni<sub>0.10</sub>-Co<sub>x</sub>-PCN-250 (x=0, 0.05, 0.10, 0.20 mol) and Fe<sub>0.02</sub>Co<sub>0.10</sub>-PCN-250.

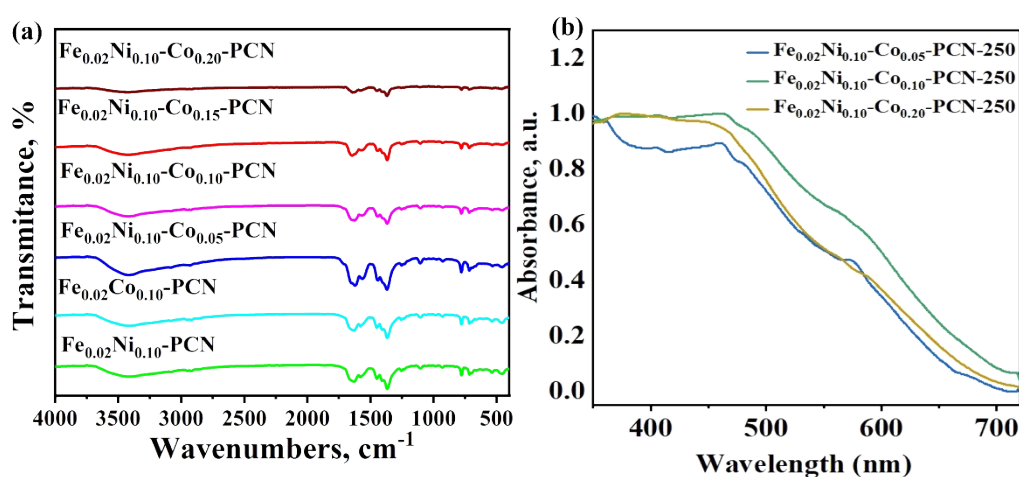

**Figure S2.** (a) FT-IR spectra of Fe<sub>0.02</sub>Ni<sub>0.10</sub>-Co<sub>x</sub>-PCN-250 (x=0, 0.05, 0.10, 0.20 mol) and Fe<sub>0.02</sub>Co<sub>0.10</sub>-PCN-250. (b) UV-vis diffuse reflectance spectra of Fe<sub>0.02</sub>Ni<sub>0.10</sub>-Co<sub>x</sub>-PCN-250 (x=0.05, 0.10, 0.20 mol).

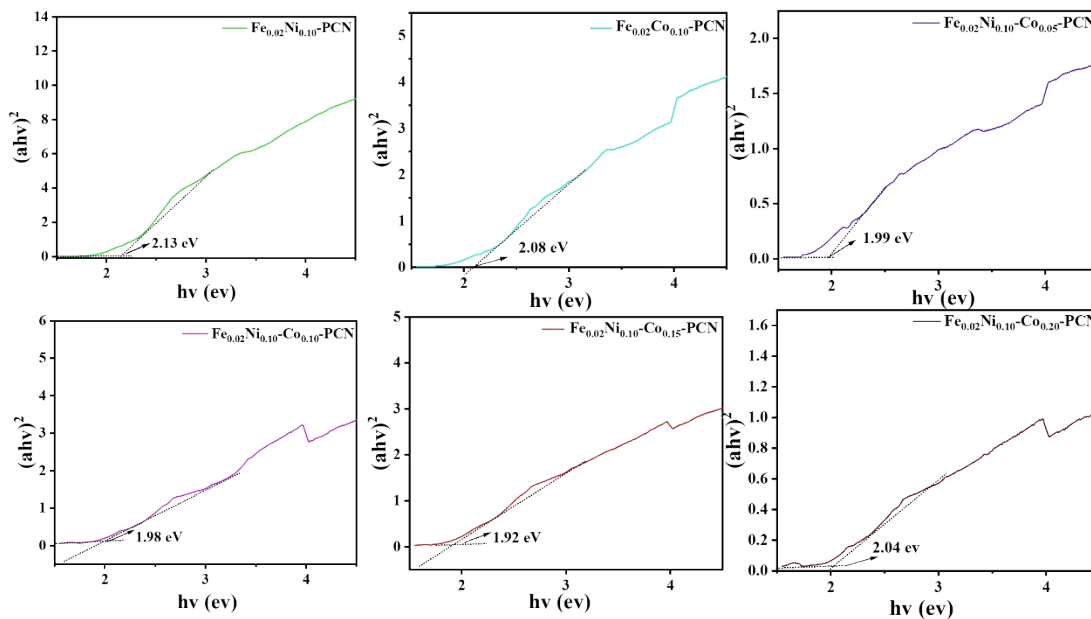

Figure S3. Tauc plot of  $\text{Fe}_{0.02}\text{Ni}_{0.10}\text{-Co}_x\text{-PCN-250}$  ( $x=0, 0.05, 0.10, 0.20$  mol) and  $\text{Fe}_{0.02}\text{Co}_{0.10}\text{-PCN-250}$  for band gap calculation based on the UV-vis diffusion spectrum.

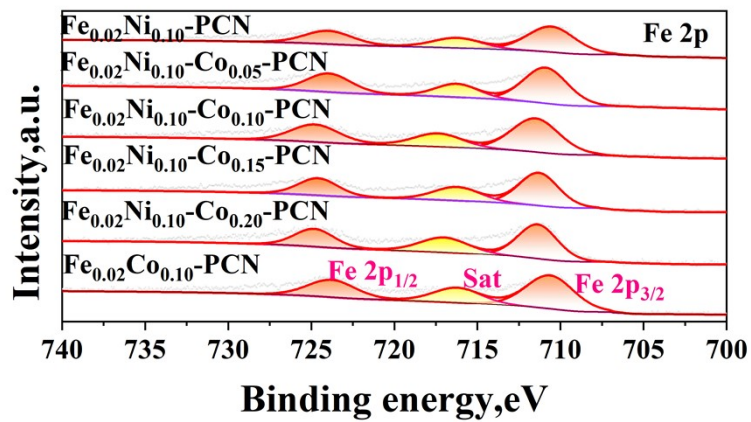

Figure S4. High-resolution XPS spectra of the Fe 2p.

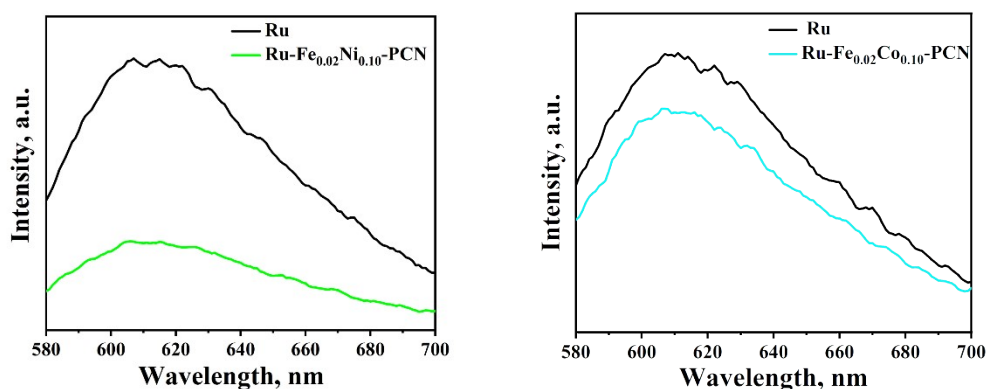

Figure S5. Steady state photoluminescence emission spectra of Ru upon the addition of  $\text{Fe}_{0.02}\text{Ni}_{0.10}\text{-PCN-250}$  ( $x=0\text{mol}$ ) and  $\text{Fe}_{0.02}\text{Co}_{0.10}\text{-PCN-250}$  ( $\lambda_{\text{ex}}=365\text{ nm}$ ) in a  $\text{CO}_2$  degassed solution of  $\text{CH}_3\text{CN/TEOA}$ .

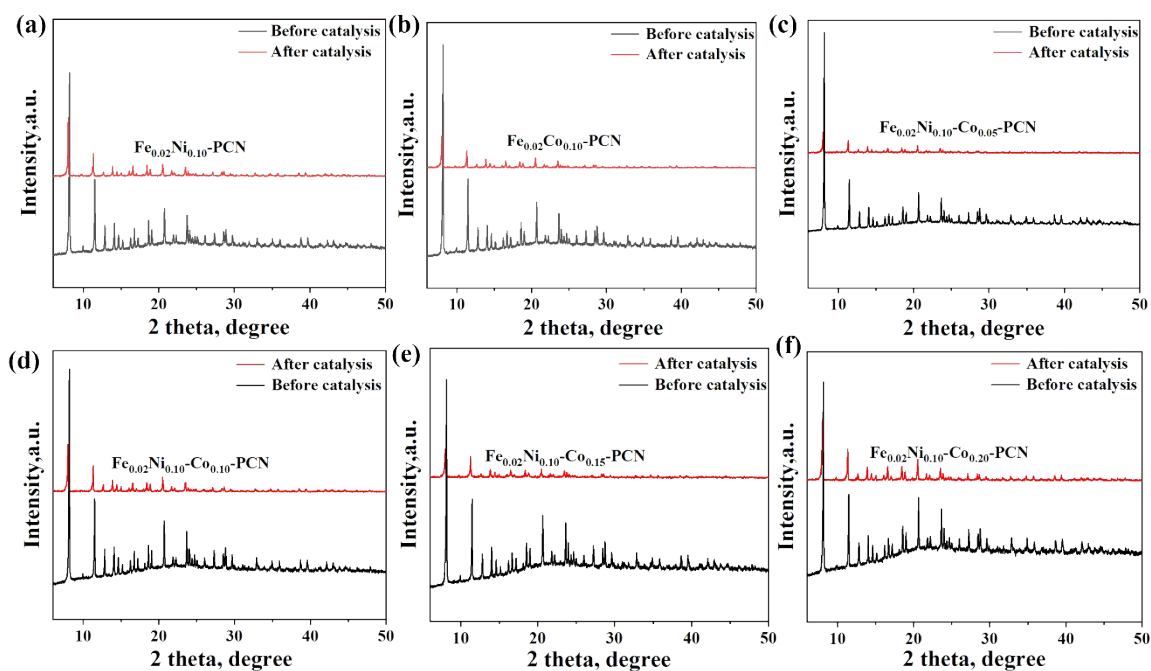

Figure S6. PXRD patterns of the  $\text{Fe}_{0.02}\text{Ni}_{0.10}\text{-Co}_x\text{-PCN-250}$  ( $x=0, 0.05, 0.10, 0.20\text{ mol}$ ) and  $\text{Fe}_{0.02}\text{Co}_{0.10}\text{-PCN-250}$  before and after photocatalysis.

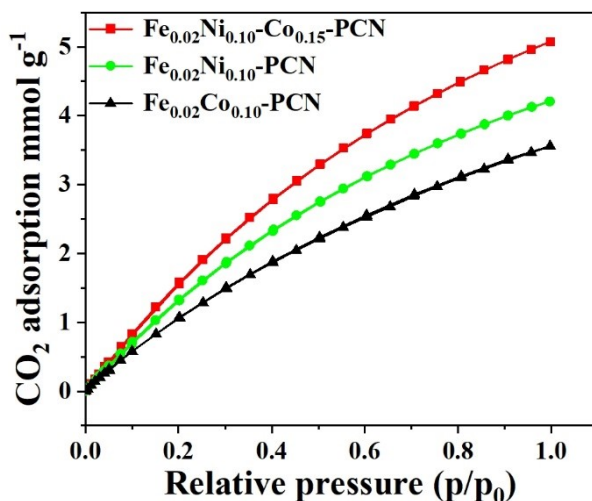

Figure S7. The CO<sub>2</sub> adsorption isotherms (273K) of Fe<sub>0.02</sub>Ni<sub>0.10</sub>-PCN-250, Fe<sub>0.02</sub>Co<sub>0.10</sub>-PCN-250 and Fe<sub>0.02</sub>Ni<sub>0.10</sub>-Co<sub>0.15</sub>-PCN-250.

|                 | Fe <sub>0.02</sub> Ni <sub>0.10</sub> -PCN-250                     | Fe <sub>0.02</sub> Ni <sub>0.10</sub> -Co <sub>0.05</sub> -PCN-250 | Fe <sub>0.02</sub> Ni <sub>0.10</sub> -Co <sub>0.10</sub> -PCN-250 |
|-----------------|--------------------------------------------------------------------|--------------------------------------------------------------------|--------------------------------------------------------------------|
| <b>mol%</b>     | Fe:17.55                                                           | Fe:13.25                                                           | Fe:14.1                                                            |
|                 | Ni:10.2                                                            | Ni:9.2                                                             | Ni:8.0                                                             |
|                 | Co:-0.0003                                                         | Co:3.4                                                             | Co:3.7                                                             |
| <b>Fe:Ni:Co</b> | 1: 0.58:-                                                          | 1: 0.69: 0.256                                                     | 1 : 0.57: 0.262                                                    |
|                 | Fe <sub>0.02</sub> Ni <sub>0.10</sub> -Co <sub>0.15</sub> -PCN-250 | Fe <sub>0.02</sub> Ni <sub>0.10</sub> -Co <sub>0.20</sub> -PCN-250 | Fe <sub>0.02</sub> -Co <sub>0.10</sub> -PCN-250                    |
| <b>mol%</b>     | Fe:17.6                                                            | Fe:10.4                                                            | Fe:17.4                                                            |
|                 | Ni:6.3                                                             | Ni:5.7                                                             | Ni:0.043                                                           |
|                 | Co:7.3                                                             | Co:7.2                                                             | Co:8.65                                                            |
| <b>Fe:Ni:Co</b> | 1: 0.36: 0.414                                                     | 1: 0.54: 0.692                                                     | 1: - :0.497                                                        |

Table S1. The inductively coupled plasma mass spectrometry (ICP-MS) of Fe<sub>0.02</sub>Ni<sub>0.10</sub>-Co<sub>x</sub>-PCN-250 (x=0, 0.05, 0.10, 0.20 mol) and Fe<sub>0.02</sub>Co<sub>0.10</sub>-PCN-250 materials.
